# Supplementary material for: Delivery of Hydrophobic Drugs to the Posterior Ocular Region by Gel-in-Water Nanoemulsion
Source: PubMed Central journal article supplement — Transl Vis Sci Technol. 2022 May 16;11(5):16. doi: 10.1167/tvst.11.5.16 (PMC9123518; doi:10.1167/tvst.11.5.16), 2022-05-16
Supplement: tvst-11-5-16_s001.pdf [file tvst-11-5-16_s001.pdf]

**In vivo ocular surface irritation study:**

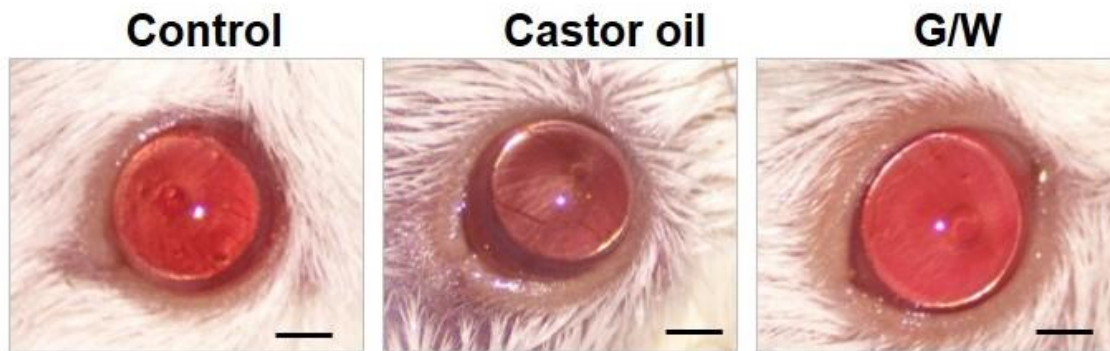

**Figure S1: Images of anterior eye segment after treatment with G/W eye drops, scale bar = 1 mm.**
