# Supplementary material for: Delivery of Hydrophobic Drugs to the Posterior Ocular Region by Gel-in-Water Nanoemulsion
Source: PubMed Central journal article supplement — Transl Vis Sci Technol. 2022 May 16;11(5):16. doi: 10.1167/tvst.11.5.16 (PMC9123518; doi:10.1167/tvst.11.5.16), 2022-05-16
Supplement: tvst-11-5-16_s002.pdf [file tvst-11-5-16_s002.pdf]

**Table S1: Ocular irritation scores of mice treated with G/W nanoemulsion as eye drops**

| <b>Experimental period</b> | <b>Control group</b><br>(Mice treated with saline) |                     |                 | <b>Castor oil group</b><br>(Mice treated with castor oil) |                     |                 | <b>G/W group</b><br>(Mice treated with G/W nanoemulsion) |                     |                 |
|----------------------------|----------------------------------------------------|---------------------|-----------------|-----------------------------------------------------------|---------------------|-----------------|----------------------------------------------------------|---------------------|-----------------|
|                            | <b>Irritation score</b>                            | <b>Ocular edema</b> | <b>Epiphora</b> | <b>Irritation score</b>                                   | <b>Ocular edema</b> | <b>Epiphora</b> | <b>Irritation score</b>                                  | <b>Ocular edema</b> | <b>Epiphora</b> |
| Day 1                      | 2                                                  | None                | None            | 1                                                         | None                | None            | 1                                                        | None                | None            |
| Day 2                      | 1                                                  | None                | None            | 1                                                         | None                | None            | 0                                                        | None                | None            |
| Day 3                      | 0                                                  | None                | None            | 2                                                         | None                | None            | 0                                                        | None                | None            |
| Day 4                      | 0                                                  | None                | None            | 0                                                         | None                | None            | 1                                                        | None                | None            |
| Day 5                      | 1                                                  | None                | None            | 0                                                         | None                | None            | 2                                                        | None                | None            |
| Day 6                      | 0                                                  | None                | None            | 1                                                         | None                | None            | 0                                                        | None                | None            |
